# Supplementary material for: HaMADS3, HaMADS7, and HaMADS8 are involved in petal prolongation and floret symmetry establishment in sunflower (Helianthus annuus L.)
Source: PeerJ journal article supplement (doi:10.7717/peerj.17586), 2024-07-02

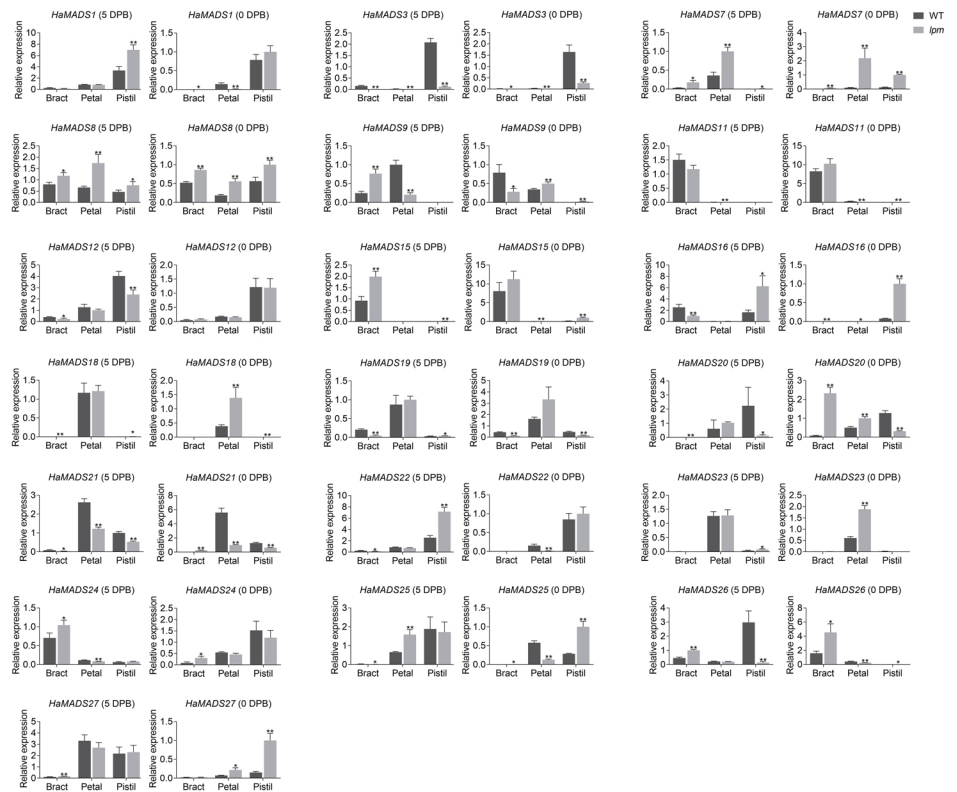

Supplement: Supplementary_figure_2.pdf [file Supplementary_figure_2.pdf]
